# Supplementary material
Source: publisher figshare collection journal article supplement (https://frontiersin.figshare.com/ndownloader/files/28240392)

Supplement: OPLS-DA of wine samples among individual investigated countries

Austria-Slovenia:


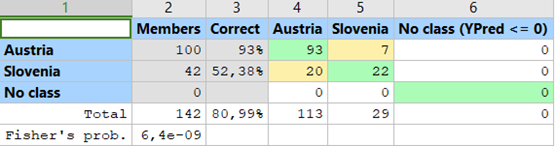


Austria-Romania:


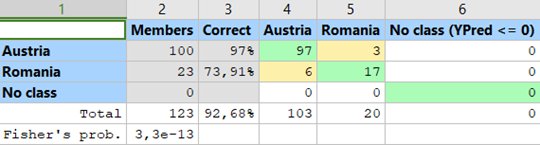


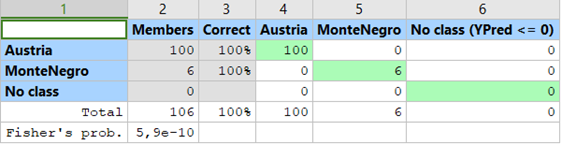
Austria-Montenegro:

Austria-Argentina:


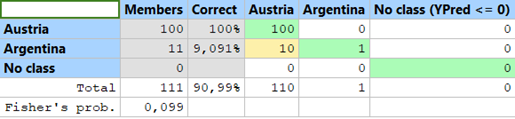


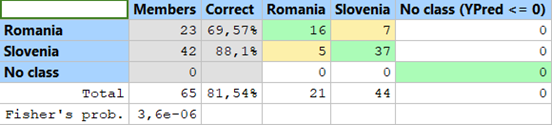
Romania-Slovenia:

Slovenia-Montenegro:


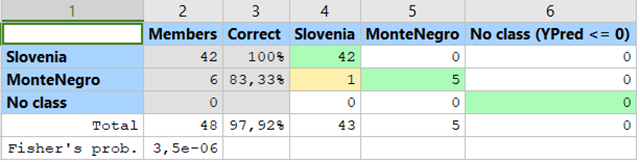


Slovenia-Argentina:


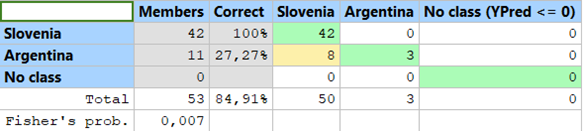


Romania-Montenegro:


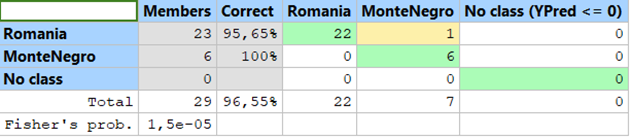


Romania-Argentina:


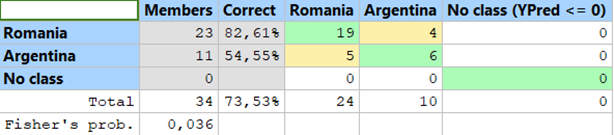


Montenegro-Argentina:


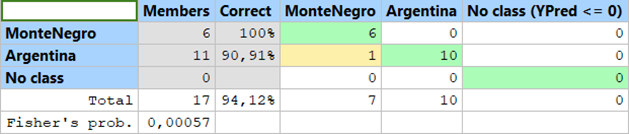

Supplement: Supplementary file 1 [file 28240392]
